# Supplementary material for: State of anion in ethylammonium nitrate enclosed between micrometer-spaced glass plates as studied by 17O and 15N NMR
Source: Royal Society of Chemistry journal article supplement (doi:10.1039/d3cp01737k), 2023-01-01
Supplement: d3cp01737k1.pdf [file d3cp01737k1.pdf]

Electronic Supplementary Information

## State of anion in ethylammonium nitrate enclosed between micrometer-spaced glass plates as studied by $^{17}\text{O}$ and $^{15}\text{N}$ NMR

Andrei Filippov,\* and Oleg N. Antzutkin

Chemistry of Interfaces, Luleå University of Technology, SE-97187 Luleå, Sweden

Correspondence

Andrei Filippov, Chemistry of Interfaces, Luleå University of Technology, Luleå, Sweden.

Email: andrei.filippov@ltu.se

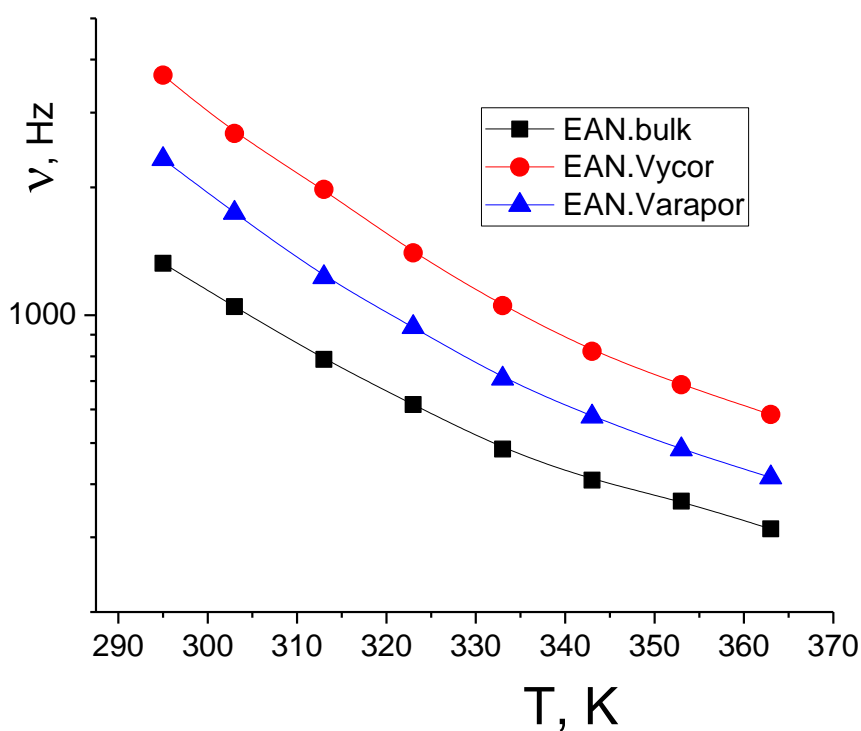

**Fig. S1.** Temperature dependences of  $^{17}\text{O}$  linewidth of  $^{15}\text{N}^{17}\text{O}$ -EAN in bulk and confined in pores of porous glasses Vycor ( $d \sim 4$  nm) and Varapor ( $d \sim 9.8$  nm).  $d$  is the mean pore diameter.

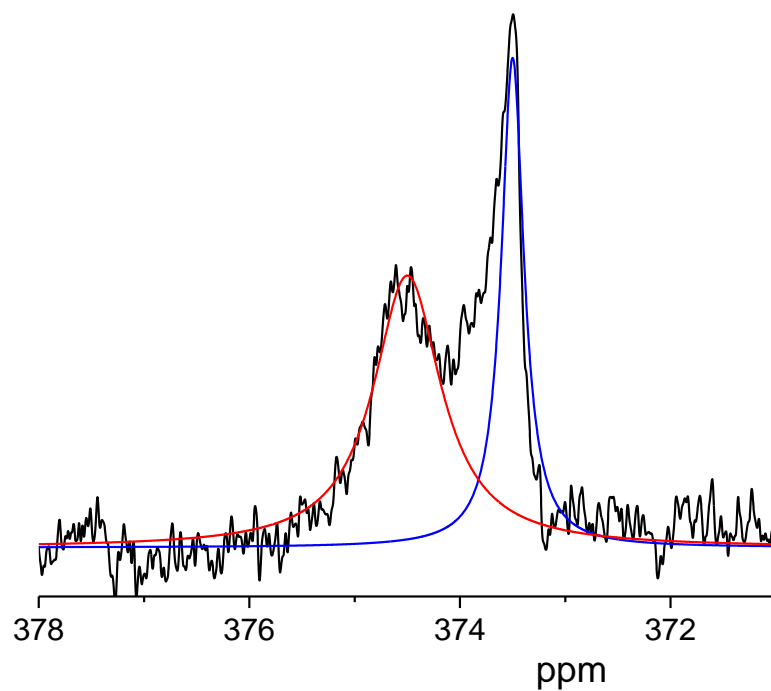

**Fig. S2.**  $^{15}\text{N}$  NMR spectrum of  $^{15}\text{N}^{17}\text{O}$ -EAN enclosed between glass plates just after placement to the magnetic field of the NMR spectrometer and approximation of its components by Lorentzian lines.
